# Supplementary material
Source: PubMed Central journal article supplement (PMC1413653)
Supplement: pnas_0510407103_2.pdf [file pnas_0510407103_2.pdf]

**Table 2.** Primer and probe sequences for human metallothionein 1 and 2, zinc transporters, and cytokines used in experiments in this report and not reported previously (1). Metallothionein primer/probe sequences were derived from MT1H (NM005951), MT1H-like (AF333388), MT1G (NM005950), MT1L (NM002450), MT1E (NM175617), MT1A (NM005946), and MT2 (NM005953).

|                                 |                |                                                  |
|---------------------------------|----------------|--------------------------------------------------|
| <b>hMT1,2</b>                   | Forward primer | 5' GCACCTCCTGCAAGAAAAGCT 3'                      |
|                                 | Probe          | 5' FAM CACAGCCCACAGGGCAGCAGG BHQ1 3'             |
|                                 | Reverse primer | 5' GCAGCCTTGGGCACACTT 3'                         |
| <b>hMT1,2 Alt</b>               | Forward primer | 5' GCACCTCCTGCAAGAAGAGCT 3'                      |
|                                 | Probe          | 5' FAM CACAGCCCACAGGACAGCAGG BHQ1 3'             |
|                                 | Reverse primer | 5' GCAGCCCTGGGCACACTT 3'                         |
| <b>hZip8</b>                    | Forward primer | 5' TCGCATGCCCTCCACAA 3'                          |
|                                 | Probe          | 5' FAM CCAATCGCCAGGCCATCGATG BHQ1 3'             |
|                                 | Reverse primer | 5' AGTCCCTGAAGGAGAGACAAGGT 3'                    |
| <b>hZip14</b>                   | Forward primer | 5' ACTTAGGGCATCGCAGATGTTT 3'                     |
|                                 | Probe          | 5' FAM ACCCATCTGTAGCATAATCATTAGGCCAACCAT BHQ1 3' |
|                                 | Reverse primer | 5' GCAGTAACCTAGACGGGTCATTTAA 3'                  |
| <b>hIFN-<math>\gamma</math></b> | Forward primer | 5' CCAACGCAAAGCAATACATGA 3'                      |
|                                 | Probe          | 5' FAM TCATCCAAGTGATGGCTGAACTGTCCG BHQ1 3'       |
|                                 | Reverse primer | 5' TTTCGCTTCCCTGTTTTAGCT 3'                      |
| <b>hTNF-<math>\alpha</math></b> | Forward primer | 5' GGAGAAGGGTGACCGACTCA 3'                       |
|                                 | Probe          | 5' FAM CGCTGAGATCAATCGGCCCGACTATC BHQ1 3'        |
|                                 | Reverse primer | 5' TGCCAGACTCGGCAAAG 3'                          |
| <b>hIL-1<math>\beta</math></b>  | Forward primer | 5' TCTTCGACACATGGGATAACGA 3'                     |
|                                 | Probe          | 5' FAM TGTGCACGATGCACCTGTACGATCA BHQ1 3'         |
|                                 | Reverse primer | 5' CCGGAGCGTGCAGTTCA 3'                          |
| <b>18S rRNA</b>                 | Forward primer | 5' AGTCCCTGCCCTTTGTACACA 3'                      |
|                                 | Probe          | 5' HEX CGCCGTCGCTACTACCGATTGG BHQ1 3'            |
|                                 | Reverse primer | 5' GATCCGAGGGCCTCACTAAAC 3'                      |

(1) Cousins, R. J., Blanchard, R. K., Popp, M. P., Liu, L., Cao, J., Moore, J. B. & Green, C. L. (2003) *Proc. Natl. Acad. Sci. USA* **100**:6952-6957.
