# Supplementary material
Source: PubMed Central journal article supplement (PMC1413653)

Rn vs Cycles

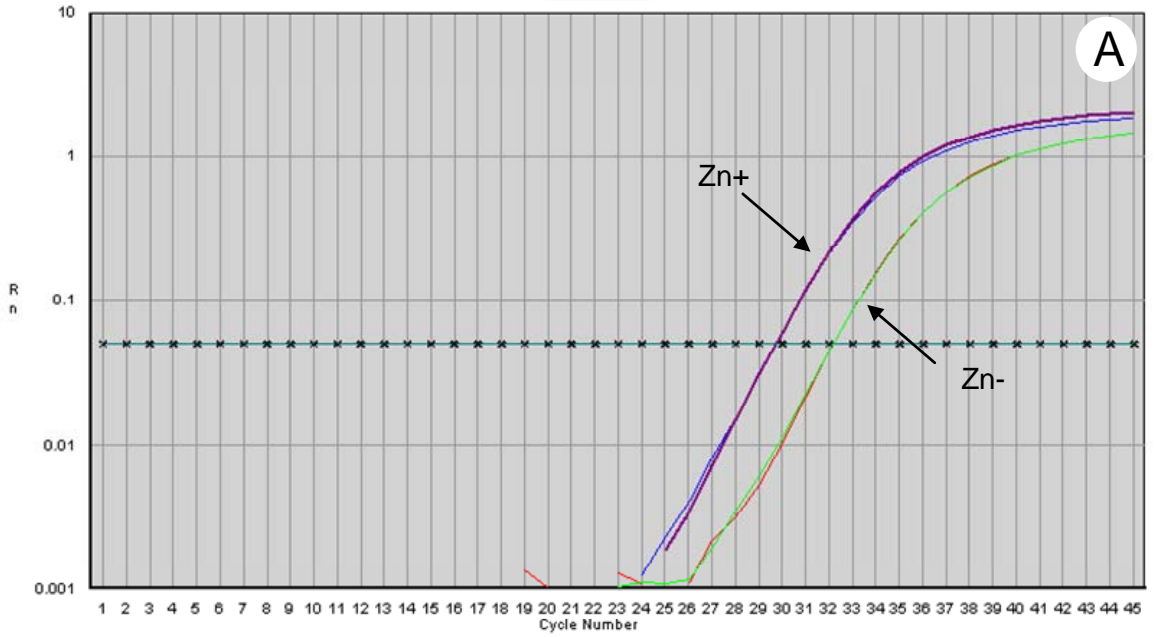

Standard Curve

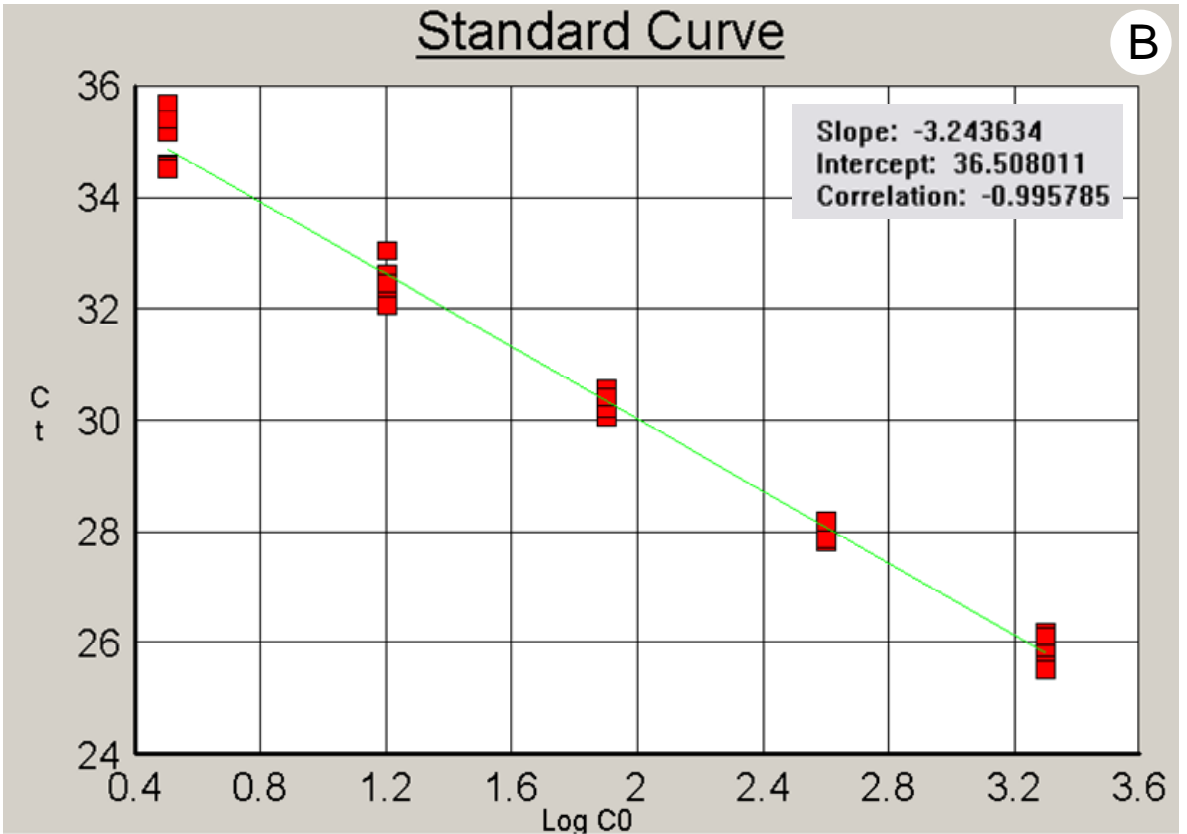

Supplement: pnas_0510407103_1.pdf [file pnas_0510407103_1.pdf]
